# Supplementary material for: Irreversible Electroporation of Malignant Hepatic Tumors - Alterations in Venous Structures at Subacute Follow-Up and Evolution at Mid-Term Follow-Up
Source: PLoS One. 2015 Aug 13;10(8):e0135773. doi: 10.1371/journal.pone.0135773 (PMC4535980; doi:10.1371/journal.pone.0135773)
Supplement: S1 Table — (XLSX) [file pone.0135773.s001.xlsx]

## Sheet: Tabelle1
Patient No (analogous to Paper)	Intervention No on patient basis	tumor	age/years	vessel kind	sex	hypertension	anticoagulation	Diabetes mellitus	Liver cirrhosis	atherosclerosis	Deep vein thrombosis	No of IRE probes	distant	encased	abutting	Vessel alteration
1	1	4	43	hv	w	0	0	0	0	0	0	5	0	1	0	0
1	1	4	43	pv	w	0	0	0	0	0	0	5	0	0	1	0
1	1	4	43	hv	w	0	0	0	0	0	0	5	0	0	1	0
1	2	4	43	hv	w	0	0	0	0	0	0	6	0.6	0	0	0
1	2	4	43	hv	w	0	0	0	0	0	0	6	0	1	0	0
1	2	4	43	pv	w	0	0	0	0	0	0	6	0	0	1	0
1	2	4	43	pv	w	0	0	0	0	0	0	6	0	0	1	0
1	2	4	43	hv	w	0	0	0	0	0	0	6	0	0	1	0
1	3	4	43	pv	w	0	0	0	0	0	0	6	0	1	0	1
1	3	4	43	hv	w	0	0	0	0	0	0	6	0	1	0	1
2	1	3	54	hv	m	0	0	0	0	0	0	5	0	1	0	0
2	1	3	54	pv	m	0	0	0	0	0	0	5	0	0	1	0
2	1	3	54	hv	m	0	0	0	0	0	0	5	0	0	1	0
2	2	3	54	pv	m	0	0	0	0	0	0	4	0.8	0	0	1
2	2	3	54	hv	m	0	0	0	0	0	0	4	0	1	0	0
2	2	3	54	pv	m	0	0	0	0	0	0	4	0	0	1	0
2	2	3	54	hv	m	0	0	0	0	0	0	4	0	0	1	0
2	3	3	54	pv	m	0	0	0	0	0	0	3	0	1	0	1
2	3	3	54	hv	m	0	0	0	0	0	0	3	0	1	0	0
2	3	3	54	hv	m	0	0	0	0	0	0	3	0	0	1	0
3	1	4	66	hv	w	0	0	0	0	0	0	5	0.9	0	0	0
3	1	4	66	pv	w	0	0	0	0	0	0	5	0.7	0	0	0
3	1	4	66	pv	w	0	0	0	0	0	0	5	0	1	0	1
3	1	4	66	pv	w	0	0	0	0	0	0	5	0	1	0	0
3	1	4	66	hv	w	0	0	0	0	0	0	5	0	0	1	0
3	1	4	66	ivc	w	0	0	0	0	0	0	5	0	0	1	0
4	1	3	63	ivc	w	0	0	0	0	0	0	5	0.9	0	0	0
4	1	3	63	pv	w	0	0	0	0	0	0	5	0.5	0	0	0
4	1	3	63	pv	w	0	0	0	0	0	0	5	0	1	0	1
4	1	3	63	hv	w	0	0	0	0	0	0	5	0	1	0	0
4	1	3	63	hv	w	0	0	0	0	0	0	5	0	1	0	0
5	1	2	68	pv	m	0	1	1	0	0	0	5	0	1	0	1
5	2	2	69	pv	m	0	1	1	0	0	0	4	0	1	0	0
5	2	2	69	hv	m	0	1	1	0	0	0	4	0	0	1	0
6	1	3	53	hv	m	0	0	0	0	0	0	3	0.9	0	0	0
6	1	3	53	ivc	m	0	0	0	0	0	0	3	0.7	0	0	0
6	1	3	53	pv	m	0	0	0	0	0	0	3	0.5	0	0	0
6	1	3	53	hv	m	0	0	0	0	0	0	3	0	0	1	0
6	2	3	54	hv	m	0	0	0	0	0	0	6	0	1	0	0
6	2	3	54	hv	m	0	0	0	0	0	0	6	0	1	0	0
6	2	3	54	pv	m	0	0	0	0	0	0	6	0	0	1	0
6	2	3	54	pv	m	0	0	0	0	0	0	6	0	0	1	0
6	2	3	54	ivc	m	0	0	0	0	0	0	6	0	0	1	0
6	3	3	54	ivc	m	0	0	0	0	0	0	5	0.9	0	0	0
6	3	3	54	pv	m	0	0	0	0	0	0	5	0	0	1	1
6	3	3	54	pv	m	0	0	0	0	0	0	5	0	0	1	0
6	3	3	54	hv	m	0	0	0	0	0	0	5	0	0	1	0
6	4	3	54	hv	m	0	0	0	0	0	0	6	0.4	0	0	0
6	4	3	54	hv	m	0	0	0	0	0	0	6	0.2	0	0	0
7	1	1	61	pv	m	0	1	1	1	0	0	4	0.5	0	0	0
7	1	1	61	hv	m	0	1	1	1	0	0	4	0.5	0	0	0
7	1	1	61	hv	m	0	1	1	1	0	0	4	0.3	0	0	0
7	1	1	61	pv	m	0	1	1	1	0	0	4	0	1	0	0
7	2	1	61	pv	m	0	1	1	1	0	0	6	0	1	0	1
7	2	1	61	pv	m	0	1	1	1	0	0	6	0	0	1	0
7	2	1	61	hv	m	0	1	1	1	0	0	6	0	0	1	0
7	2	1	61	hv	m	0	1	1	1	0	0	6	0	0	1	0
7	2	1	61	ivc	m	0	1	1	1	0	0	6	0	0	1	0
8	1	2	68	ivc	w	0	0	0	0	0	0	5	0.9	0	0	0
8	1	2	68	pv	w	0	0	0	0	0	0	5	0.2	0	0	0
8	1	2	68	pv	w	0	0	0	0	0	0	5	0	1	0	1
8	1	2	68	hv	w	0	0	0	0	0	0	5	0	1	0	0
9	1	3	65	pv	w	0	0	1	0	0	0	2	0.6	0	0	0
9	1	3	65	pv	w	0	0	1	0	0	0	2	0.4	0	0	0
9	1	3	65	pv	w	0	0	1	0	0	0	2	0	1	0	1
9	1	3	65	hv	w	0	0	1	0	0	0	2	0	0	1	0
9	1	3	65	ivc	w	0	0	1	0	0	0	2	0	0	1	0
10	1	3	80	ivc	w	0	0	1	0	0	0	4	0.9	0	0	0
10	1	3	80	pv	w	0	0	1	0	0	0	4	0.5	0	0	0
10	1	3	80	pv	w	0	0	1	0	0	0	4	0	0	1	1
10	1	3	80	hv	w	0	0	1	0	0	0	4	0	0	1	0
10	1	3	80	hv	w	0	0	1	0	0	0	4	0	0	1	0
10	2	3	81	pv	w	0	0	1	0	0	0	4	0.2	0	0	0
10	2	3	81	hv	w	0	0	1	0	0	0	4	0	1	0	0
10	2	3	81	hv	w	0	0	1	0	0	0	4	0	0	1	0
10	2	3	81	hv	w	0	0	1	0	0	0	4	0	0	1	0
10	2	3	81	ivc	w	0	0	1	0	0	0	4	0	0	1	0
11	1	1	72	pv	m	0	1	1	1	0	0	4	0	1	0	1
11	1	1	72	hv	m	0	1	1	1	0	0	4	0	1	0	0
11	2	1	73	hv	m	0	1	1	1	0	0	3	0.5	0	0	0
11	2	1	73	hv	m	0	1	1	1	0	0	3	0	1	0	0
11	2	1	73	pv	m	0	1	1	1	0	0	3	0	0	1	0
12	1	1	79	pv	m	0	1	1	1	1	0	5	0	1	0	1
12	1	1	79	hv	m	0	1	1	1	1	0	5	0	1	0	0
12	1	1	79	hv	m	0	1	1	1	1	0	5	0	0	1	0
12	1	1	79	hv	m	0	1	1	1	1	0	5	0	0	1	0
13	1	3	58	pv	m	1	0	0	0	0	0	5	0	1	0	1
14	1	1	72	pv	m	1	1	1	1	1	0	6	0	1	0	1
15	1	1	75	hv	m	0	1	1	1	0	0	5	0.1	0	0	0
15	1	1	75	pv	m	0	1	1	1	0	0	5	0	0	1	1
16	1	3	66	hv	m	0	1	1	0	0	1	5	1	0	0	1
16	1	3	66	pv	m	0	1	1	0	0	1	5	0	1	0	0
16	1	3	66	hv	m	0	1	1	0	0	1	5	0	1	0	0
16	1	3	66	pv	m	0	1	1	0	0	1	5	0	0	1	0
16	1	3	66	hv	m	0	1	1	0	0	1	5	0	0	1	0
17	1	1	54	ivc	m	0	0	0	1	1	0	6	0.8	0	0	1
17	1	1	54	pv	m	0	0	0	1	1	0	6	0	1	0	0
17	1	1	54	hv	m	0	0	0	1	1	0	6	0	1	0	0
18	1	1	45	pv	m	0	0	0	1	1	0	5	0	0	1	0
18	1	1	45	hv	m	0	0	0	1	1	0	5	0	0	1	0
19	1	1	64	hv	w	0	0	1	1	0	0	2	0.4	0	0	0
19	1	1	64	pv	w	0	0	1	1	0	0	2	0.3	0	0	0
19	1	1	64	hv	w	0	0	1	1	0	0	2	0.3	0	0	0
20	1	2	46	hv	m	0	0	0	0	0	0	3	0.8	0	0	0
20	1	2	46	hv	m	0	0	0	0	0	0	3	0.8	0	0	0
20	1	2	46	pv	m	0	0	0	0	0	0	3	0	0	1	0
20	2	2	46	hv	m	0	0	0	0	0	0	3	0.6	0	0	0
21	1	3	64	pv	m	0	0	0	0	0	0	3	0.3	0	0	0
21	1	3	64	hv	m	0	0	0	0	0	0	3	0	1	0	0
21	1	3	64	hv	m	0	0	0	0	0	0	3	0	0	1	0
21	1	3	64	ivc	m	0	0	0	0	0	0	3	0	0	1	0
22	1	1	50	pv	m	0	0	0	1	0	0	3	0.2	0	0	0
22	1	1	50	hv	m	0	0	0	1	0	0	3	0.2	0	0	0
22	1	1	50	TIPS	m	0	0	0	1	0	0	3	0	0	1	0
23	1	1	54	pv	m	0	0	0	1	0	0	4	0.9	0	0	0
23	1	1	54	pv	m	0	0	0	1	0	0	4	0	1	0	0
24	1	8	66	hv	m	0	1	1	0	0	0	6	0.9	0	0	0
25	1	9	37	hv	w	0	0	0	0	0	0	3	0	1	0	0
25	1	9	37	pv	w	0	0	0	0	0	0	3	0	0	1	0
25	1	9	37	hv	w	0	0	0	0	0	0	3	0	0	1	0
26	1	3	76	pv	m	0	0	1	0	1	0	5	0.1	0	0	0
26	2	3	77	pv	m	0	0	1	0	1	0	6	0	1	0	0
26	2	3	77	hv	m	0	0	1	0	1	0	6	0	0	1	0
27	1	1	66	hv	m	0	0	1	1	0	0	3	0.2	0	0	0
27	1	1	66	pv	m	0	0	1	1	0	0	3	0	0	1	0
27	1	1	66	pv	m	0	0	1	1	0	0	3	0	0	1	0
27	1	1	66	hv	m	0	0	1	1	0	0	3	0	0	1	0
27	1	1	66	ivc	m	0	0	1	1	0	0	3	0	0	1	0
28	1	3	49	pv	m	0	0	0	0	0	0	6	0	1	0	0
28	1	3	49	hv	m	0	0	0	0	0	0	6	0	0	1	0
29	1	3	48	pv	m	0	1	0	0	0	0	5	0	1	0	0
29	1	3	48	hv	m	0	1	0	0	0	0	5	0	0	1	0
29	1	3	48	hv	m	0	1	0	0	0	0	5	0	0	1	0
29	1	3	48	hv	m	0	1	0	0	0	0	5	0	0	1	0
29	2	3	50	hv	m	0	1	0	0	0	0	6	0.3	0	0	0
29	2	3	50	pv	m	0	1	0	0	0	0	6	0	0	1	0
29	2	3	50	hv	m	0	1	0	0	0	0	6	0	0	1	0
30	1	1	56	hv	m	0	0	0	1	0	0	4	0.5	0	0	0
30	1	1	56	pv	m	0	0	0	1	0	0	4	0.2	0	0	0
31	1	1	64	pv	m	0	0	0	1	0	0	5	0	0	1	0
32	1	1	65	hv	m	0	0	0	1	1	0	4	0.2	0	0	0
32	1	1	65	hv	m	0	0	0	1	1	0	4	0	1	0	0
32	1	1	65	hv	m	0	0	0	1	1	0	4	0	0	1	0
33	1	3	71	pv	w	0	1	0	0	0	0	6	0.2	0	0	0
33	1	3	71	hv	w	0	1	0	0	0	0	6	0	1	0	0
33	1	3	71	hv	w	0	1	0	0	0	0	6	0	1	0	0
33	1	3	71	hv	w	0	1	0	0	0	0	6	0	1	0	0
33	1	3	71	hv	w	0	1	0	0	0	0	6	0	0	1	0
33	1	3	71	ivc	w	0	1	0	0	0	0	6	0	0	1	0
34	1	3	58	pv	m	1	0	0	0	0	0	3	0.6	0	0	0
34	1	3	58	pv	m	1	0	0	0	0	0	3	0.2	0	0	0
34	1	3	58	pv	m	1	0	0	0	0	0	3	0.1	0	0	0
34	1	3	58	hv	m	1	0	0	0	0	0	3	0	0	1	0
34	1	3	58	hv	m	1	0	0	0	0	0	3	0	0	1	0
34	1	3	58	hv	m	1	0	0	0	0	0	3	0	0	1	0
34	1	3	58	ivc	m	1	0	0	0	0	0	3	0	0	1	0
35	1	5	69	pv	w	1	0	0	0	0	0	4	0.2	0	0	0
35	1	5	69	hv	w	1	0	0	0	0	0	4	0	0	1	0
36	1	3	53	pv	m	1	0	0	0	0	0	4	0.8	0	0	0
36	1	3	53	hv	m	1	0	0	0	0	0	4	0	0	1	0
36	2	3	54	hv	m	1	0	0	0	0	0	5	0	0	1	0
36	3	3	54	pv	m	1	0	0	0	0	0	3	0.3	0	0	0
36	3	3	54	hv	m	1	0	0	0	0	0	3	0.2	0	0	0
36	4	3	55	pv	m	1	0	0	0	0	0	6	0	1	0	0
36	4	3	55	hv	m	1	0	0	0	0	0	6	0	1	0	0
36	4	3	55	hv	m	1	0	0	0	0	0	6	0	0	1	0
36	4	3	55	ivc	m	1	0	0	0	0	0	6	0	0	1	0
37	1	1	61	pv	m	0	0	0	1	0	0	3	0.4	0	0	0
37	1	1	61	hv	m	0	0	0	1	0	0	3	0.4	0	0	0
38	1	3	61	hv	m	1	1	0	0	0	0	3	0.7	0	0	0
38	1	3	61	pv	m	1	1	0	0	0	0	3	0.3	0	0	0
39	1	7	44	pv	w	0	0	0	0	0	0	2	0.2	0	0	0
39	1	7	44	pv	w	0	0	0	0	0	0	2	0	1	0	0
39	1	7	44	hv	w	0	0	0	0	0	0	2	0	1	0	0
39	1	7	44	hv	w	0	0	0	0	0	0	2	0	1	0	0
40	1	6	22	pv	m	0	0	0	0	0	0	4	0.5	0	0	0
40	1	6	22	pv	m	0	0	0	0	0	0	4	0	1	0	0
40	1	6	22	hv	m	0	0	0	0	0	0	4	0	1	0	0
40	2	6	22	pv	m	0	0	0	0	0	0	2	0.8	0	0	0
40	2	6	22	pv	m	0	0	0	0	0	0	2	0	0	1	0
40	2	6	22	hv	m	0	0	0	0	0	0	2	0	0	1	0
41	1	1	72	hv	m	0	1	1	1	1	1	3	0	1	0	0
41	1	1	72	ivc	m	0	1	1	1	1	1	3	0	0	1	0
42	1	2	53	hv	m	0	0	0	0	0	0	2	0	1	0	0
42	1	2	53	pv	m	0	0	0	0	0	0	2	0	0	1	0
43	1	3	72	hv	m	1	1	0	0	0	0	4	0	1	0	0
43	1	3	72	pv	m	1	1	0	0	0	0	4	0	0	1	0
43	1	3	72	hv	m	1	1	0	0	0	0	4	0	0	1	0
43	2	3	72	pv	m	1	1	0	0	0	0	3	0	0	1	0
43	2	3	72	hv	m	1	1	0	0	0	0	3	0	0	1	0
43	3	3	72	hv	m	1	1	0	0	0	0	3	0	1	0	0
Column C	1	HCC
	2	CCC
	3	Metastasis of colorectal cancer
	4	metastasis of mammarian cancer
	5	metastasis of neuroendocrine tumor
	6	metastasis of testicular tumor
	7	metastasis of gastrinoma
	8	metastasis of esophageal cancer
	9	carcinoma of unknown origin
Column E	pv	portal vein
	hv	hepatic vein
	ivc	inferior vena cava
	TIPS	transjugular portosystemic shunt stent
Column G-L, O-Q	1	yes
	0	no
Column N	0	not distant, i.e. abutting or encased
	>0	distance in cm
